# Supplementary material for: Emission Characteristics of Polycyclic Aromatic Hydrocarbons and Nitro-Polycyclic Aromatic Hydrocarbons from Open Burning of Rice Straw in the North of Vietnam
Source: PubMed Central journal article supplement (PMC6651601; doi:10.3390/ijerph16132343), 2019-07-02
Supplement: ijerph-16-02343-s001.pdf [file ijerph-16-02343-s001.pdf]

**Table S1: Sampling information for PM<sub>2.5</sub>**

| BG Samples | Sampling time (minutes) | Volume (m <sup>3</sup> ) | Mass (mg) | Concentration (µg/m <sup>3</sup> ) | BB Samples | Sampling time (minutes) | Volume (m <sup>3</sup> ) | Mass (mg) | Concentration (µg/m <sup>3</sup> ) |
|------------|-------------------------|--------------------------|-----------|------------------------------------|------------|-------------------------|--------------------------|-----------|------------------------------------|
| BG1        | 117                     | 0.585                    | 0.346     | 591.45                             | BB1        | 35                      | 0.175                    | 1.322     | 7554.29                            |
| BG2        | 120                     | 0.6                      | 0.326     | 543.33                             | BB2        | 31                      | 0.155                    | 2.464     | 15896.77                           |
| BG3        | 120                     | 0.6                      | 0.294     | 490.00                             | BB3        | 40                      | 0.2                      | 0.844     | 4220.00                            |
| BG4        | 120                     | 0.6                      | 0.32      | 533.33                             | BB4        | 21                      | 0.105                    | 0.972     | 9257.14                            |
| BG5        | 120                     | 0.6                      | 0.34      | 566.67                             | BB5        | 35                      | 0.175                    | 0.538     | 3074.29                            |
| BG6        | 120                     | 0.6                      | 0.51      | 850.00                             | BB6        | 20                      | 0.1                      | 1.842     | 18420.00                           |
| BG7        | 120                     | 0.6                      | 0.1       | 166.67                             | BB7        | 42                      | 0.21                     | 0.078     | 371.43                             |
| BG8        | 120                     | 0.6                      | 0.112     | 186.67                             | BB8        | 21                      | 0.105                    | 3.072     | 29257.14                           |
| BG9        | 120                     | 0.6                      | 0.068     | 113.33                             | BB9        | 26                      | 0.130                    | 0.612     | 4707.69                            |
| BG10       | 120                     | 0.6                      | 0.066     | 110.00                             | BB10       | 31                      | 0.155                    | 0.776     | 5006.45                            |
| BG11       | 120                     | 0.6                      | 0.096     | 160.00                             | BB11       | 25                      | 0.125                    | 1.058     | 8464.00                            |
| BG12       | 120                     | 0.6                      | 0.284     | 473.33                             | BB12       | 24                      | 0.12                     | 1.350     | 11250.00                           |
| BG13       | 120                     | 0.6                      | 0.251     | 418.33                             | BB13       | 33                      | 0.165                    | 2.010     | 12181.82                           |
| BG14       | 120                     | 0.6                      | 0.255     | 425.00                             | BB14       | 30                      | 0.15                     | 3.180     | 21200.00                           |

Table S2: Sampling information for TSP

| BG Samples | Sampling time (minutes) | Volume (m <sup>3</sup> ) | Mass (mg) | Concentration (µg/m <sup>3</sup> ) | BB Samples | Sampling time (minutes) | Volume (m <sup>3</sup> ) | Mass (mg) | Concentration (µg/m <sup>3</sup> ) |
|------------|-------------------------|--------------------------|-----------|------------------------------------|------------|-------------------------|--------------------------|-----------|------------------------------------|
| BG1        | 120                     | 120                      | 24.40     | 203.4                              | BB1        | 35                      | 35                       | 152.8     | 4365.3                             |
| BG2        | 120                     | 120                      | 33.34     | 277.8                              | BB2        | 31                      | 31                       | 270.3     | 8718.8                             |
| BG3        | 120                     | 120                      | 35.25     | 293.8                              | BB3        | 40                      | 40                       | 74.3      | 1857.3                             |
| BG4        | 120                     | 120                      | 41.23     | 343.6                              | BB4        | 21                      | 21                       | 132.7     | 6317.5                             |
| BG5        | 120                     | 120                      | 29.24     | 243.7                              | BB5        | 35                      | 35                       | 57.2      | 1634.5                             |
| BG6        | 120                     | 120                      | 28.98     | 241.5                              | BB6        | 20                      | 20                       | 313.6     | 15678.8                            |
| BG7        | 120                     | 120                      | 11.52     | 96.0                               | BB7        | 42                      | 42                       | 15.5      | 368.0                              |
| BG8        | 120                     | 120                      | 13.44     | 112.0                              | BB8        | 21                      | 21                       | 785.7     | 37413.0                            |
| BG9        | 120                     | 120                      | 9.12      | 76.0                               | BB9        | 26                      | 26                       | 60.5      | 2327.0                             |
| BG10       | 120                     | 120                      | 12.60     | 105.0                              | BB10       | 31                      | 31                       | 152.7     | 4926.0                             |
| BG11       | 120                     | 120                      | 16.95     | 141.3                              | BB11       | 25                      | 25                       | 507.5     | 20300.0                            |
| BG12       | 120                     | 120                      | 13.65     | 113.8                              | BB12       | 24                      | 24                       | 763.5     | 19576.9                            |
| BG13       | 120                     | 120                      | 10.20     | 85.0                               | BB13       | 33                      | 33                       | 364.8     | 11053.9                            |
| BG14       | 120                     | 120                      | 10.10     | 84.2                               | BB14       | 30                      | 30                       | 576.6     | 19218.7                            |
